# Supplementary material for: Differences of Hemogram Parameters and Their Ratios among Patients with Takotsubo Syndrome, Acute Coronary Syndrome and Healthy Individuals
Source: MDPI journal article supplement (doi:10.3390/life12060788), 2022-05-26
Supplement: s1 [file s1]

Supplementary Table S1

| Univariate logistic regression<br>dependent variable= ACS |                |                         |                |         |        | M |
|-----------------------------------------------------------|----------------|-------------------------|----------------|---------|--------|---|
|                                                           | B (SE)         | OR (95%CI)              | R <sup>2</sup> | p-value | B (SE) |   |
| Age                                                       | 0.009 (0.017)  | 1.009 (0.98-1.04)       | 0.01           | 0.599   |        |   |
| Creatinine                                                | 0.018 (0.009)  | 1.018 (1.01-1.04)       | 0.04           | 0.036   |        |   |
| CRP                                                       | 0.652 (0.218)  | 1.920 (1.25-2.94)       | 0.29           | 0.003   |        |   |
| BMI                                                       | 0.064 (0.037)  | 1.066 (0.99-1.15)       | 0.03           | 0.080   |        |   |
| EF                                                        | -0.089 (0.022) | 0.915 (0.88-0.95)       | 0.24           | <0.0001 |        |   |
| Hypertension                                              | -0.213 (0.497) | 0.808 (0.31-2.14)       | 0.00           | 0.669   |        |   |
| Diabetes                                                  | 0.724 (0.421)  | 2.062 (0.90-4.70)       | 0.02           | 0.085   |        |   |
| Smoking                                                   | 0.859 (0.385)  | 2.360 (1.11-5.02)       | 0.04           | 0.026   |        |   |
| NLR                                                       | 0.728 (0.166)  | 2.072 (1.50-2.87)       | 0.24           | <0.0001 |        |   |
| BLR                                                       | -0.600 (3.896) | 0.549 (0.00-1135.96)    | 0.00           | 0.878   |        |   |
| MLR                                                       | 0.601 (0.454)  | 1.823 (0.75-4.44)       | 0.02           | 0.186   |        |   |
| Univariate logistic regression<br>dependent variable= TTC |                |                         |                |         |        | M |
|                                                           | B (SE)         | OR (95%CI)              | R <sup>2</sup> | p-value | B (SE) |   |
| Age                                                       | 0.077 (0.023)  | 1.080 (1.03-1.13)       | 0.12           | 0.001   |        |   |
| Creatinine                                                | -0.001 (0.010) | 0.999 (0.98-1.02)       | 0.00           | 0.935   |        |   |
| CRP                                                       | 0.636 (0.347)  | 1.888 (0.96-3.73)       | 0.08           | 0.067   |        |   |
| BMI                                                       | -0.059 (0.045) | 0.942 (0.86-1.03)       | 0.02           | 0.183   |        |   |
| EF                                                        | -0.315 (0.076) | 0.730 (0.63-0.85)       | 0.64           | <0.0001 |        |   |
| Hypertension                                              | -0.644 (0.521) | 0.525 (0.19-1.46)       | 0.01           | 0.217   |        |   |
| Diabetes                                                  | -0.657 (0.616) | 0.519 (0.16-1.73)       | 0.01           | 0.286   |        |   |
| Smoking                                                   | -0.076 (0.451) | 0.927 (0.38-2.25)       | 0.00           | 0.867   |        |   |
| NLR                                                       | 0.408 (0.143)  | 1.504 (1.14-1.99)       | 0.18           | 0.004   |        |   |
| BLR                                                       | 6.675 (6.208)  | 791.986 (0.00-15236.78) | 0.02           | 0.282   |        |   |
| MLR                                                       | 0.287 (0.398)  | 1.333 (0.61-2.91)       | 0.01           | 0.470   |        |   |

Multivariate logistic regression  
dependent variable= ACS  
OR (95%CI)     $R^2$                       p-value

Multivariate logistic regression  
dependent variable= TTC  
OR (95%CI)     $R^2$                       p-value
